# Supplementary material
Source: PubMed Central journal article supplement (PMC2902155)
Supplement: NIHMS203910-supplement-01.pdf [file NIHMS203910-supplement-01.pdf]

## Supplemental Table:

| <u>Magnetic field (T)</u> | <u>Analyte</u>          | <u>Abs. Average Accuracy</u> |                      | <u>First author</u> | <u>Reference</u> |
|---------------------------|-------------------------|------------------------------|----------------------|---------------------|------------------|
|                           |                         | <u>Internal cal.</u>         | <u>External cal.</u> |                     |                  |
| 0.97                      | peptides                | 10                           |                      | Vilkov              | [1]              |
| 1.9                       | small molecule          |                              | 9.2                  | White               | [2]              |
| 1.9                       | small molecule          |                              | 5.9                  | White               | [2]              |
| 3                         | peptides                |                              | 2.16                 | Kaiser              | [3]              |
| 3                         | small molecule          | 1.62                         |                      | Yin                 | [4]              |
| 3                         | small molecule          | 1.86                         |                      | Vartanian           | [5]              |
| 3                         | small molecule          | 2.63                         |                      | Yin                 | [4]              |
| 3.5                       | peptides                |                              | 2.6                  | Belov               | [6]              |
| 4.7                       | peptides                |                              | 3.2                  | Chan                | [7]              |
| 4.7                       | peptide MS <sup>2</sup> | 0.95                         |                      | Kruppa              | [8]              |
| 4.7                       | peptides                |                              | 2.3                  | Easterling          | [9]              |
| 4.7                       | oligonucleotide         | 2                            |                      | Hannis              | [10]             |
| 4.7                       | peptides                | 2.9                          |                      | Mize                | [11]             |
| 7                         | peptides                | 0.28                         |                      | Kaiser              | [12]             |
| 7                         | peptides                | 0.71                         | 1.2                  | Jing                | [13]             |
| 7                         | small molecules         | 0.4                          |                      | Burton              | [14]             |
| 7                         | peptides                | 0.32                         |                      | Palmblad            | [15]             |
| 7                         | peptides                |                              | 1.7                  | Hinsby              | [16]             |
| 7                         | peptides                |                              | 1.19                 | King                | [17]             |
| 7                         | peptide SIM             |                              | 0.17                 | Gruhler             | [18]             |
| 9.4                       | peptides                | 0.9                          | 1.2                  | Wong                | [19]             |
| 9.4                       | peptide                 | 0.54                         |                      | Lavanant            | [20]             |
| 9.4                       | petroleum               |                              | 0.26                 | Purcell             | [21]             |
| 11.5                      | peptides                |                              | 0.77                 | Bruce               | [22]             |
| 12                        | NaFA cluster            | 0.2                          |                      | Tolmachev           | [23]             |
| 14.5                      | peptides                |                              | 0.215                | Schaub              | [24]             |
| 14.5                      | SIM                     |                              | 0.034                | Schaub              | [24]             |
| 15                        | NaFA cluster            | 0.168                        |                      | Palmblad            | [25]             |

## Supplemental References

1. A. N. Vilkov, C. M. Gamage, A. S. Misharin, V. M. doroshenko, D. A. Tolmachev, I. A. Tarasova, and M. V. Gorshkov, Atmospheric Pressure Ionization Permanent Magnet Fourier Transform Ion Cyclotron Resonance Mass Spectrometry. *J Am Soc Mass Spectrom* **2007**, *18*, 1552-1558.
2. R. L. White, E. C. Onyiriuka, and C. L. Wilkins, Exact mass measurement in the absence of calibrant by Fourier-transform mass-spectrometry. *Analytical Chemistry* **1983**, *55*, 339-343.
3. N. Kaiser, G. E. Skulason, C. R. Weisbrod, and J. E. Bruce, A novel Fourier transform ion cyclotron resonance mass spectrometer with improved ion trapping and detection capabilities. *Journal of the American Society for Mass Spectrometry* **2009**, *20*, 755-62.
4. W. Yin, M. Wang, A. G. Marshall, and E. B. Ledford, Experimental evaluation of a hyperbolic ion trap for Fourier transform ion cyclotron resonance mass spectrometry. *Journal of the American Society for Mass Spectrometry* **1992**, *3*, 188-197.
5. V. H. Vartanian, F. Hadjarab, and D. A. Laude, Open cell analog of the screened trapped-ion cell using compensation electrodes for Fourier transform ion cyclotron resonance mass spectrometry. *International Journal Of Mass Spectrometry And Ion Processes* **1995**, *151*, 175-187.
6. E. B. Belov, G. A. Anderson, and R. D. Smith, Higher-resolution data-dependent selective external ion accumulation for capillary LC-FTICR. *International Journal Of Mass Spectrometry* **2002**, *218*, 265-279.
7. T. D. Chan, a. L. Duan, and T. E. Sze, Accurate Mass Measurements for Peptide and Protein Mixtures by Using Matrix-Assisted Laser Desorption/Ionization Fourier Transform Mass Spectrometry. *Anal. Chem.* **2002**, *74*, 5282-5289.
8. G. H. Kruppa, P. D. Schnier, K. Tabei, S. Van Orden, and M. M. Siegel, Multiple ion isolation applications in FT-ICR MS: Exact-mass MS<sub>n</sub> internal calibration and purification/interrogation of protein-drug complexes. *Analytical Chemistry* **2002**, *74*, 3877-3886.

9. M. L. Easterling, T. H. Mize, and I. Amster, Routine part-per-million mass accuracy for high-mass ions: Space-charge effects in MALDI FT-ICR. *Analytical Chemistry* **1999**, *71*, 624-632.
10. J. C. Hannis and D. C. Muddiman, A dual electrospray ionization source combined with hexapole accumulation to achieve high mass accuracy of biopolymers in Fourier transform ion cyclotron resonance mass spectrometry. *J Am Soc Mass Spectrom* **2000**, *11*, 876-883.
11. T. H. Mize and I. J. Amster, Broad-band ion accumulation with an internal source MALDI-FTICR-MS. *Analytical Chemistry* **2000**, *72*, 5886-5891.
12. N. Kaiser and J. E. Bruce, Reduction of ion magnetron motion and space charge using radial electric field modulation. *International Journal Of Mass Spectrometry* **2007**, *265*, 271-280.
13. L. Jing, C. Li, L. Wong, D. A. Kaplan, and I. J. Amster, Improved mass accuracy for higher mass peptides by using SWIFT excitation for MALDI-FTICR mass spectrometry. *Journal of the American Society for Mass Spectrometry* **2008**, *19*, 76-81.
14. R. D. Burton, K. P. Matuszak, C. H. Watson, and J. R. Eyler, Exact mass measurements using a 7 Tesla Fourier transform ion cyclotron resonance mass spectrometer in a good laboratory practices-regulated environment. *Journal of the American Society for Mass Spectrometry* **1999**, *10*, 1291-1297.
15. M. Palmblad, L. V. Bindschedler, T. M. Gibson, and R. Cramer, Automatic internal calibration in liquid chromatography/ Fourier transform ion cyclotron resonance mass spectrometry of protein digests. *Rapid Communications in Mass Spectrometry* **2006**, *20*, 3076-3080.
16. A. M. Hinsby, J. V. Olsen, and M. Mann, Tyrosine phosphoproteomics of fibroblast growth factor signaling: a role for insulin receptor substrate-4. *The Journal of biological chemistry* **2004**, *279*, 46438-47.
17. J. B. King, J. Gross, C. M. Lovly, H. Rohrs, H. Piwnica-Worms, and R. R. Townsend, Accurate mass-driven analysis for the characterization of protein phosphorylation. Study of the human Chk2 protein kinase. *Analytical Chemistry* **2006**, *78*, 2171-2181.

18. A. Gruhler, J. V. Olsen, S. Mohammed, P. Mortensen, N. J. Faergeman, M. Mann, and O. N. Jensen, Quantitative Phosphoproteomics Applied to the Yeast Pheromone Signaling Pathway. *Molecular & Cellular Proteomics* **2005**, *4*, 310.
19. L. Wong and I. J. Amster, Sub part-per-million mass accuracy by using stepwise-external calibration in fourier transform ion cyclotron resonance mass spectrometry. *Journal of the American Society for Mass Spectrometry* **2006**, *17*, 1681-91.
20. H. Lavanant, P. J. Derrick, A. J. Heck, and F. A. Mellon, Analysis of nisin A and some of its variants using Fourier transform ion cyclotron resonance mass spectrometry. *Analytical biochemistry* **1998**, *255*, 74-89.
21. J. M. Purcell, C. L. Hendrickson, R. P. Rodgers, and A. G. Marshall, Atmospheric pressure photoionization Fourier transform ion cyclotron resonance mass spectrometry for complex mixture analysis. *Analytical Chemistry* **2006**, *78*, 5906-5912.
22. J. E. Bruce, G. A. Anderson, J. Wen, R. Harkewicz, and R. D. Smith, High-mass-measurement accuracy and 100% sequence coverage of enzymatically digested bovine serum albumin from an ESI-FTICR mass spectrum. *Analytical Chemistry* **1999**, *71*, 2595-9.
23. A. Tolmachev, E. W. Robinson, S. Wu, L. Pa<sup>≈</sup>a-Tolifá, and R. D. Smith, FT-ICR MS optimization for the analysis of intact proteins. *International Journal Of Mass Spectrometry* **2009**, *287*, 32-38.
24. T. M. Schaub, C. L. Hendrickson, J. P. Quinn, a. Ryan P. Rodgers, and A. G. Marshall, Instrumentation and Method for Ultrahigh Resolution Field Desorption Ionization Fourier Transform Ion Cyclotron Resonance Mass Spectrometry of Nonpolar Species. *Analytical Chemistry* **2005**, *77*, 1317-1324.
25. M. Palmblad, J. W. Drijfhout, and A. M. Deelder, High Resolution Mass Spectrometry for Rapid Characterization of Combinatorial Peptide Libraries. *Journal Of Combinatorial Chemistry* *12*, 65-68.
